# Supplementary material
Source: PubMed Central journal article supplement (PMC3279603)
Supplement: NIHMS334807-supplement-01.pdf [file NIHMS334807-supplement-01.pdf]

## Figure Legends

**Supplemental Figure 1.** Graphical representation of individual sample levels of DJ-1 plotted against PET signals (FDOPA, DTBZ, and MP) measuring dopamine function. There is no significant correlation between dopamine dysfunction, measured by PET scan, in DJ-1 in the CSF of LRRK2 gene mutation carriers (A-C). In the G2019S subset of LRRK2 gene mutation carriers, there was a very weak positive correlation detected between DJ-1 and MP signal (F), but not other signals measured (D-E).

**Supplemental Table 1.** List of Kendall's tau-b statistics for LRRK2 gene mutation carriers (DJ-1 values correspond to Figure 1 A-C) and the G2019S subset of LRRK2 gene mutation carriers (DJ-1 values correspond to figure 1 D-F). There is no significant correlation between dopamine dysfunction, as measured by PET scans and  $\alpha$ SYN or DJ-1 in LRRK2 carriers. In the G2019S subset of carriers, there was a very weak correlation between DJ-1 and MP signal.

**Supplemental Table 2.** List of Kendall's tau-b statistics for LRRK2 gene mutation carriers and the G2019S subset of LRRK2 gene mutation carriers. There is no significant correlation between CSF  $\alpha$ SYN or DJ-1 and PD symptom severity, measured with either Hoehn and Yahr Stage Scale or the Unified Parkinson's Disease Rating Scale in either LRRK 2 carriers or the subset of G2019S carriers.

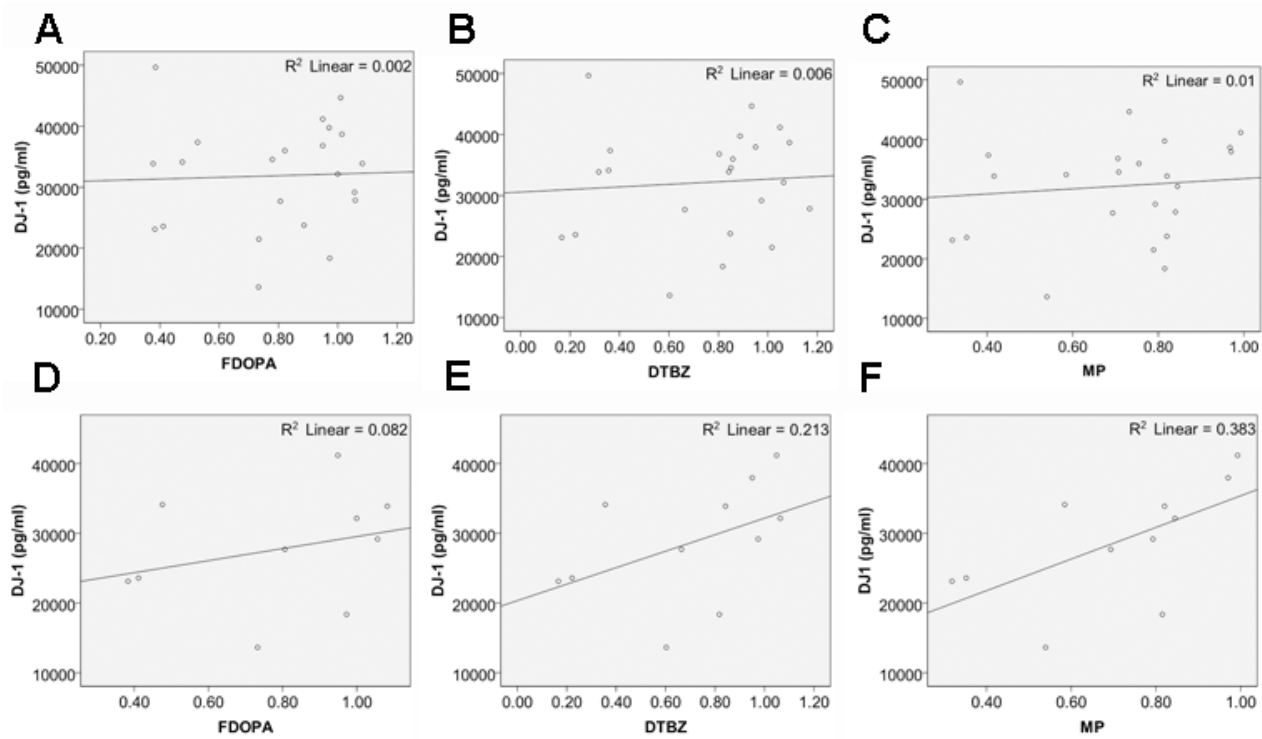

**Supplemental Figure 1.** Graphical representation of individual sample levels of DJ-1 plotted against PET signals (FDOPA, DTBZ, and MP) measuring dopamine function.

**Supplemental Table 1. Correlation coefficients describing the relationship between dopamine dysfunction and CSF levels of  $\alpha$ Synuclein and DJ-1.**

|                          | FDOPA       | DTBZ        | MP           |
|--------------------------|-------------|-------------|--------------|
| DJ-1 (all)               | .126 (.414) | .162 (.279) | .194 (.196)  |
| DJ-1 (G2019S)            | .289 (.245) | .418 (.073) | .564 (.016)* |
| Alpha-synuclein (all)    | .022 (.888) | .107 (.476) | .138 (.355)  |
| Alpha-synuclein (G2019S) | .111 (.655) | .018 (.938) | .164 (.484)  |

**Correlation coefficient (*p*-value). \*=*p*<0.05**

**Supplemental Table 2. Correlation coefficients describing the relationship between scores on Parkinson's severity scales and CSF levels of  $\alpha$ Synuclein and DJ-1.**

|                          | H&Y          | UPDRS Motor  |
|--------------------------|--------------|--------------|
| DJ-1 (all)               | -.123 (.604) | -.085 (.589) |
| DJ-1 (G2019S)            | -.356 (.251) | -.019 (.937) |
| Alpha-synuclein (all)    | .088 (.711)  | -.174 (.268) |
| Alpha-synuclein (G2019S) | -.089 (.774) | -.208 (.385) |

Correlation coefficient (*p*-value).
